# Supplementary material
Source: PubMed Central journal article supplement (PMC6644862)

## Supplementary Data

### Early Emerging Sulcal Patterns are Atypical in Fetuses with Congenital Heart Disease

Cynthia M. Ortinau, M.D.,<sup>1,2\*</sup> Caitlin K. Rollins, M.D.,<sup>3,4\*</sup> Ali Gholipour, Ph.D.,<sup>5,6</sup> Hyukjin Yun,<sup>7,8,9</sup> Mackenzie Marshall,<sup>7</sup> Borjan Gagoski, Ph.D.,<sup>5,6,7</sup> Onur Afacan, Ph.D.,<sup>5,6</sup> Kevin Friedman, M.D.,<sup>8,10</sup> Wayne Tworetzky, M.D.,<sup>8,10</sup> Simon K. Warfield, Ph.D.,<sup>5,6</sup> Jane W. Newburger, M.D., MPH,<sup>8,10</sup> Terrie E. Inder, M.D.,<sup>2,8</sup> P. Ellen Grant, M.D.,<sup>5,6,7,9</sup> Kiho Im, Ph.D.<sup>7,8,9</sup>

<sup>1</sup>Department of Pediatrics, Washington University in St. Louis, St. Louis, MO, USA. <sup>2</sup>Department of Pediatric Newborn Medicine, Brigham and Women's Hospital, Boston, MA, USA.

<sup>3</sup>Department of Neurology, Boston Children's Hospital, Boston, MA, USA. <sup>4</sup>Department of Neurology, Harvard Medical School, Boston, MA, USA. <sup>5</sup>Department of Radiology, Boston Children's Hospital, Boston, MA, USA. <sup>6</sup>Department of Radiology, Harvard Medical School, Boston, MA, USA. <sup>7</sup>Fetal Neonatal Neuroimaging and Developmental Science Center, Boston Children's Hospital, Boston, MA, USA. <sup>8</sup>Department of Pediatrics, Harvard Medical School, Boston, MA, USA. <sup>9</sup>Division of Newborn Medicine, Boston Children's Hospital Boston, MA, USA. <sup>10</sup>Department of Cardiology, Boston Children's Hospital Boston, MA, USA.

\*These authors contributed equally to this work.

**Corresponding Authors:** Cynthia Ortinau, Washington University in St. Louis, 660 South Euclid, Campus Box 8116, St. Louis, MO 63110, phone: 314-273-6002, fax: 314-286-1261, e-mail: [ortinau\\_c@wustl.edu](mailto:ortinau_c@wustl.edu) and Kiho Im, Boston Children's Hospital, 401 Park Drive, Boston, MA 02115, phone: 617-919-1481, fax: 617-730-4789, e-mail: [kiho.im@childrens.harvard.edu](mailto:kiho.im@childrens.harvard.edu)

**Supplementary Table 1.** Sulcal Pattern Similarity Between TD and CHD Groups by Fetal Sex

|                                                | Left hemisphere |               |                                     |                                | Right hemisphere |               |                                     |                                |
|------------------------------------------------|-----------------|---------------|-------------------------------------|--------------------------------|------------------|---------------|-------------------------------------|--------------------------------|
|                                                | TD              | CHD           | <i>P</i> Value<br>( <i>t</i> -test) | <i>P</i> Value<br>(regression) | TD               | CHD           | <i>P</i> Value<br>( <i>t</i> -test) | <i>P</i> Value<br>(regression) |
| <b>Males</b>                                   |                 |               |                                     |                                |                  |               |                                     |                                |
| <b><i>SI</i></b> Combined features             | 0.825 (0.025)   | 0.803 (0.031) | 0.091                               | 0.044*                         | 0.816 (0.010)    | 0.812 (0.020) | 0.574                               | 0.493                          |
| 3D position                                    | 0.878 (0.025)   | 0.860 (0.013) | 0.052                               | 0.082                          | 0.876 (0.019)    | 0.860 (0.021) | 0.112                               | 0.202                          |
| Sulcal basin area                              | 0.918 (0.018)   | 0.919 (0.050) | 0.970                               | 0.423                          | 0.916 (0.018)    | 0.928 (0.029) | 0.282                               | 0.601                          |
| Sulcal depth                                   | 0.936 (0.012)   | 0.922 (0.015) | 0.045*                              | 0.086                          | 0.928 (0.012)    | 0.928 (0.012) | 0.975                               | 0.793                          |
| <b><i>SI<sub>a</sub></i></b> Combined features | 0.761 (0.037)   | 0.753 (0.051) | 0.701                               | 0.405                          | 0.761 (0.020)    | 0.770 (0.022) | 0.352                               | 0.578                          |
| 3D position                                    | 0.896 (0.024)   | 0.880 (0.019) | 0.105                               | 0.047*                         | 0.902 (0.015)    | 0.892 (0.014) | 0.177                               | 0.245                          |
| Sulcal basin area                              | 0.809 (0.039)   | 0.811 (0.058) | 0.921                               | 0.689                          | 0.809 (0.036)    | 0.823 (0.036) | 0.395                               | 0.743                          |
| Sulcal depth                                   | 0.942 (0.015)   | 0.929 (0.014) | 0.067                               | 0.125                          | 0.944 (0.013)    | 0.929 (0.015) | 0.033*                              | 0.057                          |
| <b><i>SI<sub>b</sub></i></b> Combined features | 0.837 (0.025)   | 0.814 (0.020) | 0.037*                              | 0.047*                         | 0.827 (0.013)    | 0.820 (0.019) | 0.365                               | 0.519                          |
| 3D position                                    | 0.876 (0.027)   | 0.859 (0.014) | 0.078                               | 0.125                          | 0.871 (0.019)    | 0.856 (0.020) | 0.108                               | 0.183                          |
| Sulcal basin area                              | 0.937 (0.015)   | 0.939 (0.031) | 0.983                               | 0.576                          | 0.936 (0.014)    | 0.945 (0.013) | 0.154                               | 0.280                          |
| Sulcal depth                                   | 0.934 (0.013)   | 0.920 (0.015) | 0.040*                              | 0.073                          | 0.925 (0.013)    | 0.927 (0.013) | 0.747                               | 0.656                          |
| <b>Females</b>                                 |                 |               |                                     |                                |                  |               |                                     |                                |
| <b><i>SI</i></b> Combined features             | 0.817 (0.021)   | 0.785 (0.028) | 0.020*                              | 0.018*                         | 0.821 (0.018)    | 0.804 (0.034) | 0.245                               | 0.265                          |
| 3D position                                    | 0.872 (0.017)   | 0.850 (0.021) | 0.038*                              | 0.045*                         | 0.867 (0.018)    | 0.873 (0.023) | 0.554                               | 0.499                          |

|                              |                   |               |               |        |        |               |               |       |       |
|------------------------------|-------------------|---------------|---------------|--------|--------|---------------|---------------|-------|-------|
|                              | Sulcal basin area | 0.918 (0.020) | 0.894 (0.036) | 0.135  | 0.073  | 0.929 (0.015) | 0.903 (0.032) | 0.059 | 0.052 |
|                              | Sulcal depth      | 0.928 (0.024) | 0.924 (0.009) | 0.670  | 0.679  | 0.932 (0.013) | 0.923 (0.021) | 0.320 | 0.326 |
| <b><i>SI<sub>a</sub></i></b> | Combined features | 0.758 (0.034) | 0.725 (0.050) | 0.141  | 0.142  | 0.781 (0.032) | 0.736 (0.065) | 0.109 | 0.114 |
|                              | 3D position       | 0.893 (0.014) | 0.871 (0.020) | 0.021* | 0.023* | 0.898 (0.013) | 0.898 (0.017) | 0.993 | 0.986 |
|                              | Sulcal basin area | 0.804 (0.038) | 0.779 (0.059) | 0.332  | 0.330  | 0.832 (0.033) | 0.773 (0.071) | 0.059 | 0.060 |
|                              | Sulcal depth      | 0.939 (0.017) | 0.940 (0.013) | 0.825  | 0.808  | 0.946 (0.013) | 0.938 (0.017) | 0.307 | 0.240 |
| <b><i>SI<sub>b</sub></i></b> | Combined features | 0.827 (0.020) | 0.799 (0.025) | 0.027* | 0.033* | 0.826 (0.017) | 0.818 (0.028) | 0.458 | 0.475 |
|                              | 3D position       | 0.868 (0.017) | 0.847 (0.022) | 0.048* | 0.056  | 0.862 (0.019) | 0.869 (0.022) | 0.538 | 0.502 |
|                              | Sulcal basin area | 0.936 (0.015) | 0.919 (0.025) | 0.115  | 0.103  | 0.944 (0.012) | 0.927 (0.022) | 0.086 | 0.099 |
|                              | Sulcal depth      | 0.926 (0.026) | 0.920 (0.010) | 0.513  | 0.507  | 0.930 (0.013) | 0.919 (0.021) | 0.263 | 0.279 |

Data: mean (standard deviation). *SI*: Similarity of the whole sulcal pattern, *SI<sub>a</sub>*: Similarity between corresponding sulcal basins, *SI<sub>b</sub>*: Similarity of intersulcal relationship. \* $P < 0.05$ .

Supplementary Figure 1. Cortical surfaces and sulcal basin identification from two raters (different volume image segmentation) for two TD subjects (subject 20 and 21).

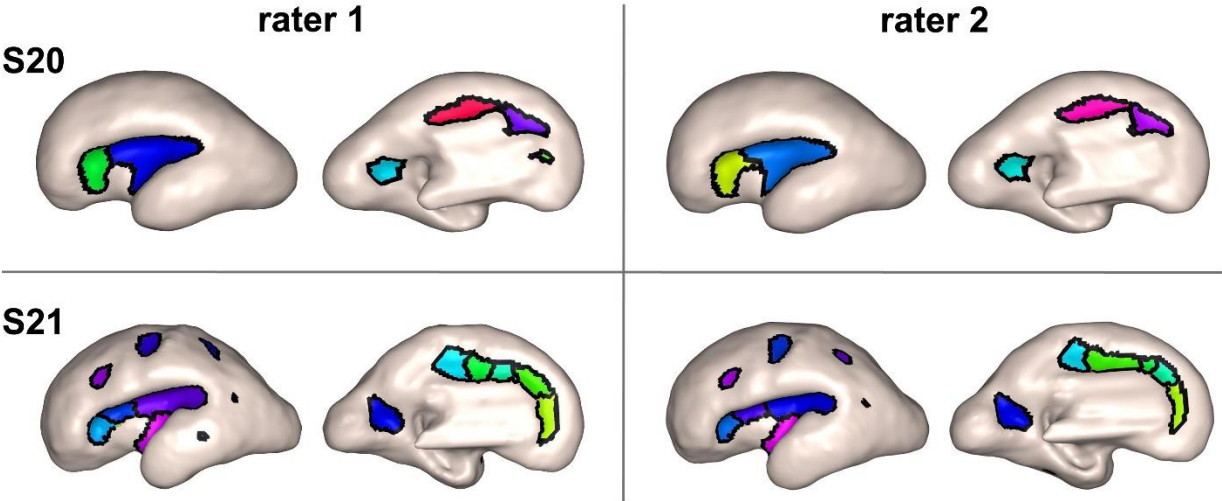

Supplementary Figure 2. Individual cortical surfaces for all TD and CHD fetuses. Each circle represents a sulcal basin in each region for the Sylvian fissure (blue), early emerging sulci (purple), and late emerging sulci (aqua). Subject IDs (S1 - S36) correspond to the IDs shown in Table 1. Data: ( $S_i / S_{i_b}$ ),  $S_i$ : Sulcal pattern similarity to the templates of the whole sulcal pattern using combined features,  $S_{i_b}$ : Sulcal pattern similarity of intersulcal relationship using combined features.

### Individual cortical surfaces for TD fetuses

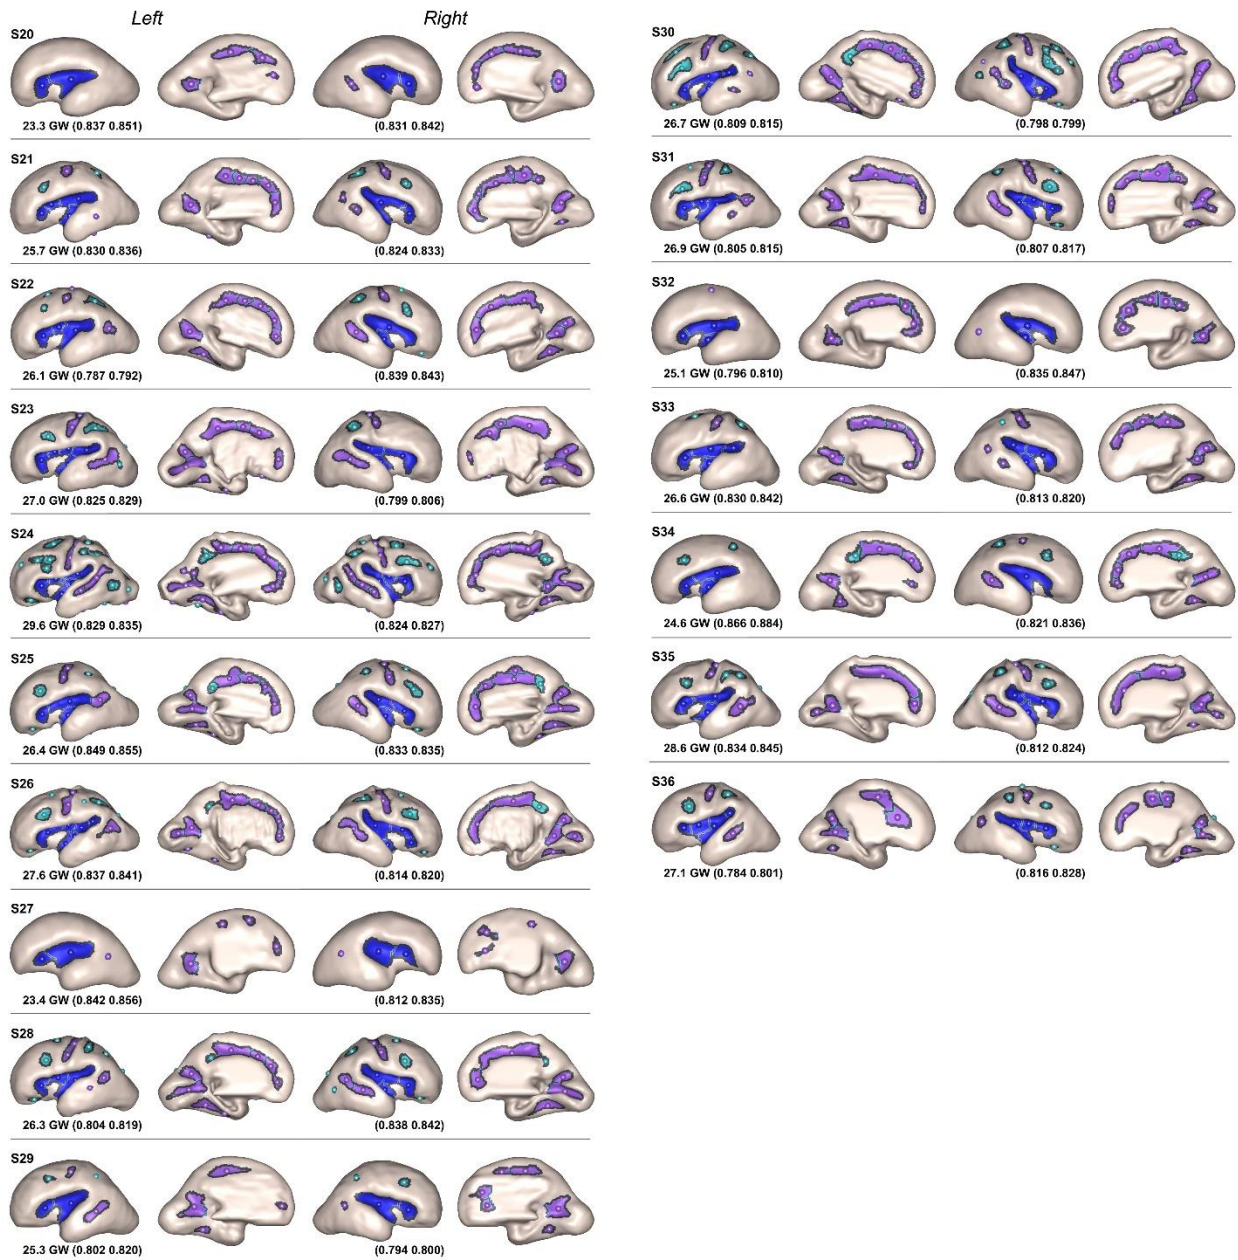

# Individual cortical surfaces for CHD fetuses

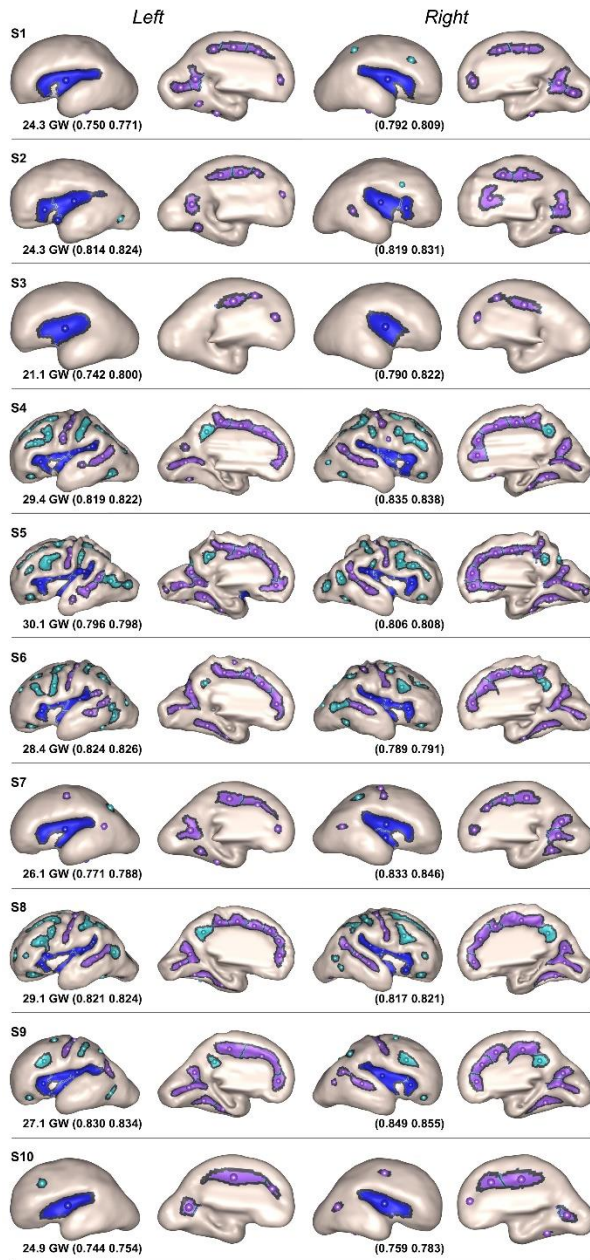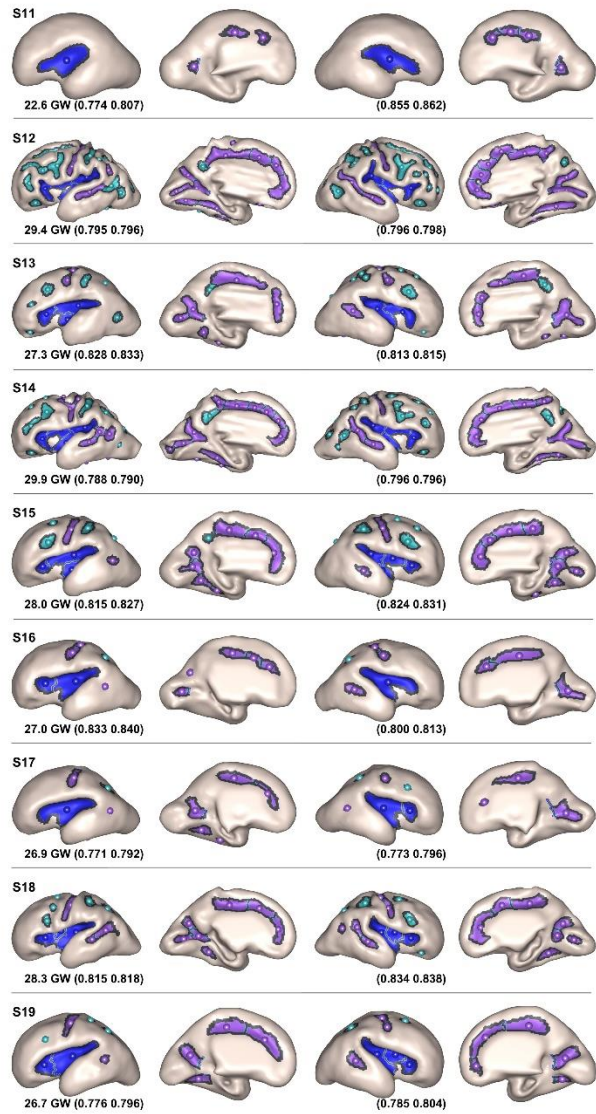

Supplement: fcbfetalsulcalpatterns_cerebralcortex_supplementarydata_revision2_bhy235.pdf [file fcbfetalsulcalpatterns_cerebralcortex_supplementarydata_revision2_bhy235.pdf]
